# Supplementary material
Source: Elsevier journal article supplement (https://www.sciencedirect.com/science/article/pii/S0213911114002568)
Supplement: mmc1 [file S0213911114002568:mmc1.doc]

**Apéndice 1**

Ítems incluidos en la versión corta del CCAENA©, según el tipo y la dimensión de continuidad asistencial

| Tipo de continuidad | Escala de continuidad asistencial | Atributos de continuidad | Ítem |
| --- | --- | --- | --- |
| Continuidad de relación | Vínculo paciente-proveedor de atención primaria | Confianza entre proveedor y paciente | Confío en la capacidad profesional de mi médico general |
| Me siento a gusto para hablar con mi médico general sobre mis preocupaciones o problemas de salud |
| Recomendaría mi médico general a amigos y familiares |
| Comunicación | La información que el médico general me da es suficiente |
| Vínculo paciente-proveedor de atención especializada | Confianza entre proveedor y paciente | Confío en la capacidad profesional de los especialistas que me tratan |
| Me siento a gusto para hablar con mis especialistas sobre mis preocupaciones o problemas de salud |
| Recomendaría mis especialistas a amigos y familiares |
| Comunicación efectiva | La información que los especialistas me dan es suficiente |
| Continuidad de información | Transferencia de información | Conocimiento de la historia clínica | Mi médico general conoce las indicaciones que el especialista ha hecho antes de que se las explique |
| Mis especialistas conocen las indicaciones que el médico general ha hecho antes de que se las explique |
| Entrega de información oportuna y adecuada a los pacientes | Mi médico general me pregunta sobre la consulta con los especialitas |
| Continuidad de gestión clínica | Coherencia de la atención | Coherencia de la atención entre niveles asistenciales | Mi médico general está de acuerdo con las indicaciones del especialista |
| Los especialistas están de acuerdo con las indicaciones del médico general |
| Coordinación entre niveles asistenciales | Pienso que el médico general colabora con los especialistas para resolver mi problema de salud |
